# Supplementary material for: Being on the Field When the Game Is Still Under Way. The Financial Press and Stock Markets in Times of Crisis
Source: PLoS One. 2013 Jul 5;8(7):e67721. doi: 10.1371/journal.pone.0067721 (PMC3702541; doi:10.1371/journal.pone.0067721)
Supplement: Dataset S1 — Excel file reporting the newspaper data used for the construction of the bad news indexes. (XLSX) [file pone.0067721.s001.xlsx]

## Sheet: Dataset S1
W1	W2	W3	W4	F1	F2	F3	F4	S1	S2	S3	S4	FTJ1	FTJ2	FTJ3	FTJ4	FTJ5	FTJ6	FTJ7	FTJC1	FTJC2	FTJC3	FTJC4	FTJC5	FTJC6	FTJC7
0	0	0	0	1	0.857143	6	0	0	0	0	0	17	0	0	0	0	0	0	0	0	0	0	0	0	0
0	0	0	0	0	0	0	0	1	0	0	0	0	0	0	0	0	0	0	0	0	0	0	0	0	0
0	0	0	0	1	0.285714	2	0	3	0.714286	5	0	6	40	0	0	0	0	0	1	0	0	0	0	0	0
0	0	0	0	0	0	0	0	0	0	0	0	0	0	0	0	0	0	0	0	0	0	0	0	0	0
0	0	0	0	1	0.285714	2	0	2	0.714286	5	1	3	47	0	0	0	0	0	1	0	0	0	0	0	0
1	0.833333	5	0	0	0	0	0	1	0.428571	5	1	0	0	0	0	0	0	0	0	0	0	0	0	0	0
2	0.5	3	2	2	0.571429	4	0	1	0.714286	5	2	1	4	6	0	0	0	0	1	1	1	0	0	0	0
1	0	0	0	1	0.714286	5	2	0	0	0	0	8	1	0	0	0	0	0	1	1	0	0	0	0	0
2	0.5	3	1	2	0.571429	4	3	2	0.714286	5	0	2	7	1	8	0	0	0	1	1	1	1	0	0	0
0	0	0	0	1	0.714286	5	0	3	0.714286	6	1	2	7	6	0	0	0	0	1	1	1	0	0	0	0
3	0.833333	5	0	1	0.714286	5	0	1	0	0	0	6	2	7	0	0	0	0	1	1	1	0	0	0	0
3	0.833333	5	1	2	0.714286	5	4	2	0	0	0	0	6	2	1	48	17	0	0	1	1	1	0	0	0
2	0.833333	5	1	2	0.571429	4	3	0	0	0	0	2	6	7	1	28	0	0	1	1	1	1	0	0	0
3	0.833333	5	0	1	0.857143	6	2	0	0	0	0	2	1	0	0	0	0	0	1	1	0	0	0	0	0
2	0.833333	5	0	1	0.714286	5	2	1	0	0	0	2	8	0	0	0	0	0	1	1	0	0	0	0	0
1	0.5	3	0	1	0.857143	6	4	3	0.857143	5	1	1	8	28	0	0	0	0	1	1	0	0	0	0	0
3	0.5	3	0	1	0.857143	6	2	4	0.857143	7	1	3	38	1	8	0	0	0	1	0	1	1	0	0	0
1	0.5	3	0	1	0.857143	6	0	0	0	0	0	1	2	28	8	0	0	0	1	1	0	1	0	0	0
3	0.5	3	1	3	0.857143	6	0	2	0	0	0	1	25	0	21	0	0	0	1	0	0	0	0	0	0
1	0.5	3	0	1	0.857143	6	2	2	0.571429	9	0	2	1	8	0	0	0	0	1	1	1	0	0	0	0
3	0.833333	5	0	1	0.714286	5	0	3	0.714286	4	0	21	8	0	0	0	0	0	0	1	0	0	0	0	0
3	0.833333	5	0	3	0.857143	6	3	1	0.714286	7	2	8	2	1	0	0	0	0	1	1	1	0	0	0	0
3	0.5	3	1	3	0.857143	6	1	2	0.714286	6	0	21	1	8	2	32	5	0	0	1	1	1	0	1	0
1	0.5	3	1	2	0.857143	6	0	2	0	0	0	1	4	2	21	8	16	0	1	1	1	0	1	0	0
2	0.5	3	0	2	0.714286	5	0	0	0	0	0	6	10	21	25	0	0	0	1	0	0	0	0	0	0
2	0.833333	5	1	2	0.857143	6	2	2	0.714286	5	0	1	6	27	2	14	0	0	1	1	0	1	0	0	0
3	0.833333	5	0	2	0.571429	4	1	2	0.714286	6	0	34	13	9	6	25	38	0	0	0	1	1	0	0	0
2	0.833333	5	0	2	0.714286	5	0	2	0.428571	8	0	10	13	1	4	0	0	0	0	0	1	1	0	0	0
3	0.833333	5	1	2	0.714286	5	2	0	0	0	0	3	0	0	0	0	0	0	1	0	0	0	0	0	0
2	0.5	3	0	1	0.285714	2	0	2	0.857143	7	2	0	1	25	8	0	0	0	0	1	0	1	0	0	0
3	0.833333	5	0	3	0.571429	4	3	3	0.714286	5	0	5	17	2	9	0	0	0	1	0	1	1	0	0	0
3	0.5	3	0	2	0.857143	6	2	3	0.714286	5	0	4	8	33	0	0	0	0	1	1	0	0	0	0	0
2	0.5	3	0	2	0.857143	6	0	1	0.714286	3	2	9	4	10	8	0	0	0	1	1	0	1	0	0	0
3	0.5	3	1	2	0.714286	5	2	2	0.714286	6	1	1	0	6	0	0	0	0	1	0	1	0	0	0	0
1	0.5	3	1	2	0.857143	6	4	3	0.714286	4	1	33	0	5	1	15	0	0	0	0	1	1	0	0	0
1	0.5	3	1	2	0.857143	6	2	1	0	0	0	4	64	5	0	0	0	0	1	0	1	0	0	0	0
1	0.5	3	0	2	0.857143	6	2	6	1.14286	6	2	4	18	6	0	0	0	0	1	0	1	0	0	0	0
2	0.5	3	0	2	0.857143	6	0	5	0.857143	6	2	5	1	11	6	9	0	0	1	1	1	1	1	0	0
2	0.5	3	0	1	0.714286	5	0	7	1.14286	7	0	1	8	0	0	0	0	0	1	1	0	0	0	0	0
3	0.5	3	3	2	0.857143	6	4	5	0.857143	4	1	9	10	21	22	0	0	0	1	0	0	0	0	0	0
3	0.5	3	1	2	0.285714	2	2	5	0.857143	6	1	75	6	0	0	0	0	0	1	1	0	0	0	0	0
1	0.5	3	2	3	0.428571	3	4	2	0.714286	4	0	37	40	0	0	0	0	0	0	0	0	0	0	0	0
1	0.5	3	1	1	0.285714	2	0	1	0.714286	7	1	27	0	0	0	0	0	0	0	0	0	0	0	0	0
2	0.5	3	1	2	0.714286	5	2	4	0.857143	5	0	57	5	0	0	0	0	0	0	1	0	0	0	0	0
1	0.5	3	2	2	0.571429	4	1	5	0.714286	6	0	71	8	58	0	0	0	0	0	1	0	0	0	0	0
2	0.5	3	1	1	0.285714	2	2	2	0.857143	5	2	20	0	0	0	0	0	0	0	0	0	0	0	0	0
2	0.5	3	1	2	0.571429	4	2	1	0.714286	6	1	11	3	0	0	0	0	0	1	1	0	0	0	0	0
0	0	0	0	1	0.857143	6	2	1	0.714286	6	1	3	8	0	0	0	0	0	1	1	0	0	0	0	0
0	0	0	0	2	0.571429	4	2	2	0.714286	4	1	0	16	2	0	0	0	0	0	0	1	0	0	0	0
2	0.833333	5	0	2	0.571429	4	1	0	0	0	0	1	45	43	42	0	0	0	1	0	0	0	0	0	0
3	0.5	3	1	1	0.285714	2	14	2	0	0	0	63	29	0	0	0	0	0	0	0	0	0	0	0	0
2	0	0	0	2	0.857143	6	2	1	0.714286	6	2	1	45	55	0	0	0	0	1	0	0	0	0	0	0
2	0.5	3	0	2	0.285714	2	4	2	0.714286	5	1	71	8	36	0	0	0	0	0	1	0	0	0	0	0
1	0	0	0	1	0.857143	6	0	3	0.714286	3	0	8	36	0	0	0	0	0	1	0	0	0	0	0	0
2	0.5	3	2	1	0.142857	1	2	4	1.14286	6	2	54	0	0	0	0	0	0	0	0	0	0	0	0	0
1	0.5	3	0	0	0	0	0	1	0.428571	9	0	0	0	0	0	0	0	0	0	0	0	0	0	0	0
1	0	0	0	1	0.857143	6	2	2	0.857143	9	1	2	32	0	0	0	0	0	1	0	0	0	0	0	0
1	0.5	3	1	0	0	0	0	2	0.857143	8	1	0	0	0	0	0	0	0	0	0	0	0	0	0	0
2	0.5	3	2	1	0.714286	5	2	0	0	0	0	4	3	0	0	0	0	0	1	1	0	0	0	0	0
1	0	0	0	2	0.285714	2	0	3	0.714286	4	0	73	26	0	0	0	0	0	0	0	0	0	0	0	0
3	0.5	3	0	1	0.285714	2	0	3	0.714286	4	0	2	77	0	0	0	0	0	1	0	0	0	0	0	0
1	0	0	0	3	0.428571	3	4	2	0	0	0	0	0	0	0	0	0	0	0	0	0	0	0	0	0
2	0.833333	5	0	1	0.285714	2	2	3	0.714286	4	0	6	0	0	0	0	0	0	1	0	0	0	0	0	0
0	0	0	0	1	0.285714	2	2	0	0	0	0	4	0	0	0	0	0	0	1	0	0	0	0	0	0
0	0	0	0	1	0.714286	5	2	1	0.714286	6	2	3	0	0	0	0	0	0	1	0	0	0	0	0	0
0	0	0	0	2	0.857143	6	3	1	0	0	0	3	66	0	0	0	0	0	1	0	0	0	0	0	0
1	0	0	0	1	0.714286	5	0	0	0	0	0	9	1	0	0	0	0	0	1	1	0	0	0	0	0
1	0	0	0	2	0.714286	5	2	3	0.857143	5	1	2	0	0	0	0	0	0	1	0	0	0	0	0	0
0	0	0	0	1	0.285714	2	4	1	0.714286	7	2	6	0	0	0	0	0	0	1	0	0	0	0	0	0
2	0.5	3	1	1	0.714286	5	0	2	0.714286	5	0	3	5	0	0	0	0	0	1	1	0	0	0	0	0
2	0.5	3	1	1	0.714286	5	2	2	0.428571	10	3	18	0	0	0	0	0	0	0	0	0	0	0	0	0
2	0.5	3	0	1	0.714286	5	4	1	0	0	0	2	0	0	0	0	0	0	1	0	0	0	0	0	0
2	0.5	3	1	2	0.285714	2	2	2	0	0	0	9	4	16	0	0	0	0	1	1	0	0	0	0	0
1	0.5	3	0	1	0.714286	5	0	3	0.714286	6	1	0	74	0	0	0	0	0	0	0	0	0	0	0	0
1	0.5	3	1	3	0.571429	4	2	2	0.714286	5	0	14	76	11	0	0	0	0	0	0	1	0	0	0	0
0	0	0	0	1	0.714286	5	4	2	0.428571	8	3	5	13	0	0	0	0	0	1	0	0	0	0	0	0
1	0.5	3	0	1	0.142857	1	2	3	0.714286	7	0	3	0	0	0	0	0	0	1	0	0	0	0	0	0
3	0.5	3	1	1	0	0	0	2	0.428571	8	0	11	0	0	0	0	0	0	1	0	0	0	0	0	0
1	0	0	0	2	0.857143	6	0	0	0	0	0	26	52	0	0	0	0	0	0	0	0	0	0	0	0
0	0	0	0	1	0.285714	2	2	2	0.428571	7	2	0	47	0	0	0	0	0	0	0	0	0	0	0	0
1	0.5	3	1	2	0.428571	3	0	2	0.714286	5	2	56	11	13	26	0	0	0	0	1	0	0	0	0	0
2	0	0	0	1	0.285714	2	2	3	0.714286	3	0	4	3	0	0	0	0	0	1	1	0	0	0	0	0
1	0.5	3	0	1	0.714286	5	2	3	0.714286	6	1	3	4	0	0	0	0	0	1	1	0	0	0	0	0
1	0	0	0	2	0.285714	2	4	1	0	0	0	4	14	23	16	0	0	0	1	0	0	0	0	0	0
2	0	0	0	1	0.142857	1	0	1	0	0	0	23	16	0	0	0	0	0	0	0	0	0	0	0	0
1	0.5	3	0	0	0	0	0	1	0.714286	5	0	0	0	0	0	0	0	0	0	0	0	0	0	0	0
0	0	0	0	1	0.142857	1	2	1	0	0	0	48	0	0	0	0	0	0	0	0	0	0	0	0	0
0	0	0	0	2	0.714286	5	2	3	0.714286	5	0	9	5	15	0	0	0	0	1	1	0	0	0	0	0
3	0.833333	5	0	2	0.142857	1	2	1	0.714286	4	0	1	0	0	0	0	0	0	1	0	0	0	0	0	0
3	0.833333	5	0	3	0.428571	3	1	1	0	0	0	21	0	26	5	17	14	0	0	0	0	1	0	0	0
2	0.833333	5	0	2	0.714286	5	0	1	0	0	0	3	10	2	0	0	0	0	1	0	1	0	0	0	0
3	0.833333	5	0	2	0.285714	2	0	0	0	0	0	5	0	0	0	0	0	0	1	0	0	0	0	0	0
2	0.833333	5	0	1	0.714286	5	2	0	0	0	0	1	0	0	0	0	0	0	1	0	0	0	0	0	0
1	0.5	3	0	3	0.428571	3	1	2	0	0	0	1	0	0	14	13	0	0	1	0	0	0	0	0	0
1	0.5	3	0	1	0	0	0	1	0	0	0	2	0	41	0	0	0	0	1	0	0	0	0	0	0
0	0	0	0	3	0.857143	6	0	3	0.714286	5	1	21	0	10	0	0	0	0	0	0	0	0	0	0	0
0	0	0	0	2	0.285714	2	0	3	0.714286	4	1	19	50	0	0	0	0	0	0	0	0	0	0	0	0
2	0.833333	5	0	2	0.428571	3	4	1	0	0	0	13	51	69	0	0	0	0	0	0	0	0	0	0	0
2	0.833333	5	0	0	0	0	0	0	0	0	0	0	0	0	0	0	0	0	0	0	0	0	0	0	0
2	0.5	3	1	0	0	0	0	2	0.714286	5	0	0	0	0	0	0	0	0	0	0	0	0	0	0	0
1	0.5	3	0	1	0.285714	2	4	1	0.428571	8	0	61	0	0	0	0	0	0	0	0	0	0	0	0	0
2	0.5	3	0	0	0	0	0	2	0.714286	4	2	0	0	0	0	0	0	0	0	0	0	0	0	0	0
3	0.833333	5	0	1	0	0	0	1	0	0	0	14	0	0	0	0	0	0	0	0	0	0	0	0	0
1	0.5	3	0	3	0.857143	6	1	1	0	0	0	0	1	59	0	0	0	0	0	1	0	0	0	0	0
3	0.5	3	0	1	0.142857	1	2	2	0	0	0	1	0	0	0	0	0	0	1	0	0	0	0	0	0
1	0.5	3	0	1	0	0	0	1	0	0	0	2	0	0	0	0	0	0	1	0	0	0	0	0	0
0	0	0	0	1	0.857143	6	0	1	0	0	0	3	0	0	0	0	0	0	1	0	0	0	0	0	0
1	0.5	3	0	1	0.857143	6	0	1	0	0	0	5	0	0	0	0	0	0	1	0	0	0	0	0	0
1	0.5	3	1	1	0.285714	2	2	1	0.428571	8	2	17	67	0	0	0	0	0	0	0	0	0	0	0	0
1	0.5	3	0	0	0	0	0	0	0	0	0	0	0	0	0	0	0	0	0	0	0	0	0	0	0
0	0	0	0	3	0.857143	6	0	1	0	0	0	6	4	19	0	0	0	0	1	1	0	0	0	0	0
2	0.5	3	0	2	0.285714	2	2	1	0	0	0	3	1	29	0	0	0	0	1	1	0	0	0	0	0
3	0.5	3	0	2	0.857143	6	4	1	0	0	0	5	19	0	0	0	0	0	1	0	0	0	0	0	0
0	0	0	0	1	0.285714	2	4	1	0	0	0	15	24	0	0	0	0	0	0	0	0	0	0	0	0
1	0.166667	1	0	1	0.142857	1	2	1	0.714286	5	0	5	0	0	0	0	0	0	1	0	0	0	0	0	0
1	0.833333	5	1	3	0.428571	3	2	0	0	0	0	2	15	3	0	0	0	0	1	0	1	0	0	0	0
0	0	0	0	2	0.571429	4	5	0	0	0	0	3	2	7	6	0	0	0	1	1	1	1	0	0	0
1	0	0	0	2	0.285714	2	2	0	0	0	0	2	7	23	72	0	0	0	1	1	0	0	0	0	0
1	0.166667	1	1	2	0.428571	3	0	1	0	0	0	0	6	1	2	0	0	0	0	1	1	1	0	0	0
1	0.166667	1	0	2	0.571429	4	4	1	0	0	0	9	6	15	0	0	0	0	1	1	0	0	0	0	0
0	0	0	0	1	0.142857	1	4	0	0	0	0	4	0	0	0	0	0	0	1	0	0	0	0	0	0
0	0	0	0	3	0.428571	3	4	0	0	0	0	15	0	0	0	0	0	0	0	0	0	0	0	0	0
1	0	0	0	2	0.285714	2	0	0	0	0	0	7	14	24	0	0	0	0	1	0	0	0	0	0	0
0	0	0	0	2	0.714286	5	4	1	0.428571	4	0	20	78	0	0	0	0	0	0	0	0	0	0	0	0
1	0.666667	4	0	3	0.428571	3	1	1	0	0	0	0	2	3	0	0	0	0	0	1	1	0	0	0	0
0	0	0	0	3	0.571429	4	2	0	0	0	0	0	6	27	0	0	0	0	0	1	0	0	0	0	0
0	0	0	0	3	0.428571	3	3	0	0	0	0	14	24	1	2	0	0	0	0	0	1	1	0	0	0
0	0	0	0	2	0.285714	2	4	2	0.714286	4	0	4	1	7	0	0	0	0	1	1	1	0	0	0	0
1	0.166667	1	0	1	0.714286	5	2	1	0	0	0	4	6	0	0	0	0	0	1	1	0	0	0	0	0
1	0.5	3	0	2	0.428571	3	5	1	0.714286	4	0	17	5	1	0	0	0	0	0	1	1	0	0	0	0
0	0	0	0	1	0.714286	5	0	1	0	0	0	10	0	0	0	0	0	0	0	0	0	0	0	0	0
2	0.166667	1	0	1	0.285714	2	0	1	0	0	0	2	0	0	0	0	0	0	1	0	0	0	0	0	0
1	0.666667	4	0	2	0.285714	2	0	1	0.714286	4	0	12	18	0	0	0	0	0	0	0	0	0	0	0	0
0	0	0	0	3	0.428571	3	2	0	0	0	0	3	4	0	2	0	0	0	1	1	0	1	0	0	0
0	0	0	0	2	0.285714	2	4	0	0	0	0	11	9	18	0	0	0	0	1	1	0	0	0	0	0
0	0	0	0	3	0.142857	1	0	0	0	0	0	2	7	5	12	3	0	0	1	1	1	0	1	0	0
0	0	0	0	2	0.142857	1	2	1	0.714286	7	0	9	6	5	0	0	0	0	1	1	1	0	0	0	0
1	0.166667	1	0	2	0.857143	6	2	1	0.857143	6	2	18	2	0	0	0	0	0	0	1	0	0	0	0	0
2	0.666667	4	0	2	0.285714	2	0	1	0	0	0	4	2	0	0	0	0	0	1	1	0	0	0	0	0
0	0	0	0	2	0.285714	2	4	1	0	0	0	11	0	0	0	0	0	0	1	0	0	0	0	0	0
0	0	0	0	2	0.714286	5	2	1	0.714286	5	1	3	39	2	12	0	0	0	1	0	1	0	0	0	0
0	0	0	0	3	0.142857	1	4	1	0.428571	7	3	3	2	0	0	0	0	0	1	1	0	0	0	0	0
1	0	0	0	1	0	0	0	0	0	0	0	4	0	0	0	0	0	0	1	0	0	0	0	0	0
2	0.666667	4	0	0	0	0	0	0	0	0	0	0	0	0	0	0	0	0	0	0	0	0	0	0	0
3	0.833333	5	1	2	0.857143	6	2	0	0	0	0	4	14	0	0	0	0	0	1	0	0	0	0	0	0
2	0.833333	5	0	2	0.285714	2	2	0	0	0	0	20	5	3	0	0	0	0	0	1	1	0	0	0	0
3	0.833333	5	0	1	0.714286	5	0	0	0	0	0	35	0	0	0	0	0	0	0	0	0	0	0	0	0
2	0.833333	5	0	1	0.285714	2	0	1	0.714286	3	1	1	0	0	0	0	0	0	1	0	0	0	0	0	0
2	0.833333	5	1	1	0.285714	2	4	0	0	0	0	0	0	0	0	0	0	0	0	0	0	0	0	0	0
3	0.833333	5	0	2	0.285714	2	0	0	0	0	0	13	2	0	0	0	0	0	0	1	0	0	0	0	0
0	0	0	0	2	0.857143	6	0	0	0	0	0	0	6	0	0	0	0	0	0	1	0	0	0	0	0
1	0.833333	5	0	2	0.285714	2	0	0	0	0	0	2	6	0	0	0	0	0	1	1	0	0	0	0	0
3	0.666667	4	0	2	0.857143	6	0	1	0	0	0	0	6	0	0	0	0	0	0	1	0	0	0	0	0
0	0	0	0	3	0.857143	6	4	2	0	0	0	2	3	0	0	0	0	0	1	1	0	0	0	0	0
0	0	0	0	2	0.714286	5	4	1	0.714286	5	0	3	11	0	0	0	0	0	1	1	0	0	0	0	0
1	0	0	0	1	0.714286	5	0	0	0	0	0	2	7	0	0	0	0	0	1	1	0	0	0	0	0
1	0.666667	4	1	2	0.714286	5	2	2	0	0	0	3	0	0	0	0	0	0	1	0	0	0	0	0	0
0	0	0	0	3	0.428571	3	3	1	0	0	0	18	7	39	0	0	0	0	0	1	0	0	0	0	0
1	0.333333	2	0	2	0.142857	1	2	1	0	0	0	18	43	0	0	0	0	0	0	0	0	0	0	0	0
0	0	0	0	1	0.285714	2	2	0	0	0	0	10	0	0	0	0	0	0	0	0	0	0	0	0	0
0	0	0	0	2	0.857143	6	1	0	0	0	0	18	9	3	0	0	0	0	0	1	1	0	0	0	0
0	0	0	0	0	0	0	0	0	0	0	0	0	0	0	0	0	0	0	0	0	0	0	0	0	0
0	0	0	0	1	0.285714	2	0	0	0	0	0	0	0	0	0	0	0	0	0	0	0	0	0	0	0
1	0.666667	4	1	1	0.285714	2	0	1	0.714286	5	0	0	18	0	0	0	0	0	0	0	0	0	0	0	0
1	0.833333	5	0	1	0.285714	2	0	0	0	0	0	18	0	0	0	0	0	0	0	0	0	0	0	0	0
0	0	0	0	2	0.285714	2	2	1	0	0	0	10	3	0	0	0	0	0	0	1	0	0	0	0	0
0	0	0	0	2	0.571429	4	4	1	0.714286	5	1	1	5	12	0	0	0	0	1	1	0	0	0	0	0
0	0	0	0	1	0.714286	5	0	2	0.714286	6	1	1	5	12	0	0	0	0	1	1	0	0	0	0	0
2	0.666667	4	0	1	0.714286	5	0	0	0	0	0	29	0	0	0	0	0	0	0	0	0	0	0	0	0
1	0.666667	4	1	1	0.714286	5	0	1	0	0	0	0	0	0	0	0	0	0	0	0	0	0	0	0	0
2	0.166667	1	0	1	0.285714	2	2	1	0.714286	6	1	0	12	0	0	0	0	0	0	0	0	0	0	0	0
2	0.333333	2	1	1	0.714286	5	0	1	0.428571	9	0	1	12	0	0	0	0	0	1	0	0	0	0	0	0
1	0.666667	4	0	3	0.428571	3	0	1	0.714286	6	1	5	19	4	0	0	0	0	1	0	1	0	0	0	0
1	0.333333	2	1	2	0.142857	1	3	0	0	0	0	10	12	15	1	0	0	0	0	0	0	1	0	0	0
1	0.666667	4	1	2	0.285714	2	2	0	0	0	0	0	0	0	0	0	0	0	0	0	0	0	0	0	0
2	0.333333	2	3	1	0.714286	5	2	1	0	0	0	5	0	0	0	0	0	0	1	0	0	0	0	0	0
1	0.5	3	1	1	0.714286	5	0	0	0	0	0	12	10	0	0	0	0	0	0	0	0	0	0	0	0
0	0	0	0	2	0.428571	3	0	3	0	0	0	5	9	4	0	0	0	0	1	1	1	0	0	0	0
0	0	0	0	0	0	0	0	1	0	0	0	0	0	0	0	0	0	0	0	0	0	0	0	0	0
1	0.666667	4	1	2	0.714286	5	2	1	0	0	0	4	31	0	0	0	0	0	1	0	0	0	0	0	0
1	0.333333	2	1	2	0.714286	5	0	0	0	0	0	4	12	3	0	0	0	0	1	0	1	0	0	0	0
1	0	0	0	1	0	0	0	3	0.714286	5	0	1	0	0	0	0	0	0	1	0	0	0	0	0	0
0	0	0	0	0	0	0	0	2	0	0	0	0	0	0	0	0	0	0	0	0	0	0	0	0	0
0	0	0	0	0	0	0	0	3	0	0	0	0	0	0	0	0	0	0	0	0	0	0	0	0	0
0	0	0	0	1	0.714286	5	0	0	0	0	0	34	0	0	0	0	0	0	0	0	0	0	0	0	0
0	0	0	0	1	0	0	0	3	0.714286	4	0	0	0	0	0	0	0	0	0	0	0	0	0	0	0
0	0	0	0	0	0	0	0	3	0.714286	6	2	0	0	0	0	0	0	0	0	0	0	0	0	0	0
0	0	0	0	1	0.142857	1	0	2	0.428571	10	0	0	0	0	0	0	0	0	0	0	0	0	0	0	0
0	0	0	0	0	0	0	0	3	0.428571	7	1	0	0	0	0	0	0	0	0	0	0	0	0	0	0
1	0.333333	2	0	0	0	0	0	0	0	0	0	0	0	0	0	0	0	0	0	0	0	0	0	0	0
1	0.333333	2	1	1	0.714286	5	0	3	0.714286	5	1	1	12	0	0	0	0	0	1	0	0	0	0	0	0
1	0	0	0	1	0.285714	2	4	1	0	0	0	0	0	0	0	0	0	0	0	0	0	0	0	0	0
0	0	0	0	1	0.285714	2	0	0	0	0	0	3	0	0	0	0	0	0	1	0	0	0	0	0	0
0	0	0	0	0	0	0	0	3	0.714286	3	0	0	0	0	0	0	0	0	0	0	0	0	0	0	0
2	0.333333	2	1	2	0.142857	1	4	2	0	0	0	22	1	0	0	0	0	0	0	1	0	0	0	0	0
0	0	0	0	0	0	0	0	1	0	0	0	0	0	0	0	0	0	0	0	0	0	0	0	0	0
0	0	0	0	1	0.714286	5	2	0	0	0	0	13	17	0	0	0	0	0	0	0	0	0	0	0	0
0	0	0	0	2	0.285714	2	0	1	0	0	0	1	22	0	0	0	0	0	1	0	0	0	0	0	0
1	0	0	0	2	0.142857	1	0	2	0.714286	4	0	13	7	0	0	0	0	0	0	1	0	0	0	0	0
0	0	0	0	1	0.714286	5	2	0	0	0	0	24	0	0	0	0	0	0	0	0	0	0	0	0	0
1	0.833333	5	0	2	0.285714	2	2	2	0	0	0	4	1	0	0	0	0	0	1	1	0	0	0	0	0
0	0	0	0	2	0.142857	1	4	1	0	0	0	13	23	0	0	0	0	0	0	0	0	0	0	0	0
0	0	0	0	0	0	0	0	2	0.571429	9	1	0	0	0	0	0	0	0	0	0	0	0	0	0	0
0	0	0	0	1	0.285714	2	2	0	0	0	0	46	0	0	0	0	0	0	0	0	0	0	0	0	0
0	0	0	0	0	0	0	0	1	0.714286	6	0	0	0	0	0	0	0	0	0	0	0	0	0	0	0
0	0	0	0	0	0	0	0	1	0	0	0	0	0	0	0	0	0	0	0	0	0	0	0	0	0
1	0.333333	2	0	2	0.142857	1	2	4	0.428571	9	0	2	17	0	0	0	0	0	1	0	0	0	0	0	0
1	0	0	0	0	0	0	0	3	0.714286	5	0	0	0	0	0	0	0	0	0	0	0	0	0	0	0
1	0.833333	5	0	2	0.285714	2	0	4	0.714286	5	1	1	15	12	0	0	0	0	1	0	0	0	0	0	0
1	0.666667	4	1	1	0.285714	2	2	0	0	0	0	2	7	0	0	0	0	0	1	1	0	0	0	0	0
1	0.833333	5	0	1	0.714286	5	6	1	0.714286	6	1	3	4	0	0	0	0	0	1	1	0	0	0	0	0
0	0	0	0	3	0.428571	3	0	3	0	0	0	2	1	3	22	0	0	0	1	1	1	0	0	0	0
1	0	0	0	0	0	0	0	1	0	0	0	0	0	0	0	0	0	0	0	0	0	0	0	0	0
1	0.166667	1	0	2	0.857143	6	4	0	0	0	0	4	3	2	0	0	0	0	1	1	1	0	0	0	0
0	0	0	0	1	0.285714	2	4	1	0	0	0	10	6	0	0	0	0	0	0	1	0	0	0	0	0
0	0	0	0	1	0	0	0	0	0	0	0	5	0	0	0	0	0	0	1	0	0	0	0	0	0
0	0	0	0	2	0.285714	2	0	1	0.428571	6	0	16	5	23	0	0	0	0	0	1	0	0	0	0	0
0	0	0	0	0	0	0	0	0	0	0	0	0	0	0	0	0	0	0	0	0	0	0	0	0	0
0	0	0	0	0	0	0	0	0	0	0	0	0	0	0	0	0	0	0	0	0	0	0	0	0	0
3	0.833333	5	0	1	0.714286	5	2	0	0	0	0	1	2	0	0	0	0	0	1	1	0	0	0	0	0
1	0.666667	4	0	1	0.285714	2	2	0	0	0	0	27	0	0	0	0	0	0	0	0	0	0	0	0	0
0	0	0	0	1	0.714286	5	0	2	0	0	0	7	2	0	0	0	0	0	1	1	0	0	0	0	0
1	0.666667	4	1	1	0.285714	2	4	1	0	0	0	4	0	0	0	0	0	0	1	0	0	0	0	0	0
1	0	0	0	1	0.714286	5	0	1	0	0	0	9	4	0	0	0	0	0	1	1	0	0	0	0	0
1	0.833333	5	1	0	0	0	0	0	0	0	0	0	0	0	0	0	0	0	0	0	0	0	0	0	0
1	0	0	0	0	0	0	0	1	0	0	0	0	0	0	0	0	0	0	0	0	0	0	0	0	0
0	0	0	0	0	0	0	0	1	0.428571	9	1	0	0	0	0	0	0	0	0	0	0	0	0	0	0
1	0	0	0	1	0.142857	1	6	1	0	0	0	3	0	0	0	0	0	0	1	0	0	0	0	0	0
0	0	0	0	2	0.142857	1	2	1	0	0	0	60	4	30	0	0	0	0	0	1	0	0	0	0	0
1	0.666667	4	0	1	0.142857	1	4	0	0	0	0	5	0	0	0	0	0	0	1	0	0	0	0	0	0
0	0	0	0	1	0.142857	1	0	1	0	0	0	1	0	0	0	0	0	0	1	0	0	0	0	0	0
1	0.666667	4	0	1	0.285714	2	0	0	0	0	0	1	0	0	0	0	0	0	1	0	0	0	0	0	0
1	0.166667	1	0	2	0.714286	5	0	2	0	0	0	5	3	24	0	0	0	0	1	1	0	0	0	0	0
1	0.5	3	0	3	0.857143	6	7	2	0.714286	5	2	1	15	0	0	0	0	0	1	0	0	0	0	0	0
1	0.166667	1	1	1	0	0	0	1	0.428571	8	2	3	0	0	0	0	0	0	1	0	0	0	0	0	0
2	0.166667	1	0	1	0.857143	6	6	0	0	0	0	1	0	0	0	0	0	0	1	0	0	0	0	0	0
1	0.666667	4	0	0	0	0	0	2	0	0	0	0	0	0	0	0	0	0	0	0	0	0	0	0	0
2	0.333333	2	1	0	0	0	0	2	0.714286	5	0	0	0	0	0	0	0	0	0	0	0	0	0	0	0
0	0	0	0	1	0.714286	5	4	1	0	0	0	0	35	0	0	0	0	0	0	0	0	0	0	0	0
1	0.666667	4	1	2	0.857143	6	0	1	0	0	0	3	24	0	0	0	0	0	1	0	0	0	0	0	0
0	0	0	0	1	0.285714	2	4	0	0	0	0	9	4	0	0	0	0	0	1	1	0	0	0	0	0
2	0.666667	4	0	0	0	0	0	0	0	0	0	0	0	0	0	0	0	0	0	0	0	0	0	0	0
0	0	0	0	0	0	0	0	0	0	0	0	0	0	0	0	0	0	0	0	0	0	0	0	0	0
1	0.666667	4	0	0	0	0	0	0	0	0	0	0	0	0	0	0	0	0	0	0	0	0	0	0	0
2	0.166667	1	0	0	0	0	0	0	0	0	0	0	0	0	0	0	0	0	0	0	0	0	0	0	0
0	0	0	0	1	0.285714	2	2	1	0	0	0	0	0	0	0	0	0	0	0	0	0	0	0	0	0
0	0	0	0	0	0	0	0	0	0	0	0	0	0	0	0	0	0	0	0	0	0	0	0	0	0
1	0.166667	1	1	1	0	0	0	1	0	0	0	0	0	0	0	0	0	0	0	0	0	0	0	0	0
1	0.166667	1	0	0	0	0	0	1	0.571429	8	1	0	0	0	0	0	0	0	0	0	0	0	0	0	0
1	0.833333	5	1	1	0.142857	1	0	1	0.714286	5	1	11	0	0	0	0	0	0	1	0	0	0	0	0	0
0	0	0	0	0	0	0	0	1	0	0	0	0	0	0	0	0	0	0	0	0	0	0	0	0	0
1	0	0	0	1	0.714286	5	0	0	0	0	0	3	1	0	0	0	0	0	1	1	0	0	0	0	0
2	0.166667	1	1	2	0.428571	3	0	1	0	0	0	0	9	0	0	0	0	0	0	1	0	0	0	0	0
